# Supplementary material
Source: PubMed Central journal article supplement (PMC3234299)
Supplement: NIHMS336661-supplement-SI.pdf [file NIHMS336661-supplement-SI.pdf]

# New Perspectives on Iron–Ligand Vibrations of Oxyheme Complexes\*\*

## Supporting Information

Jianfeng Li, Qian Peng, Alexander Barabanchikov, Jeffrey W. Pavlik, E. Ercan Alp, Wolfgang Sturhahn, Jiyong Zhao, Charles E. Schulz, J. Timothy Sage and W. Robert Scheidt\*

May 3, 2011

[★] Dr. Jianfeng Li, Dr. Qian Peng, Jeffrey W. Pavlik, Prof. W. Robert Scheidt  
Department of Chemistry and Biochemistry  
University of Notre Dame, Notre Dame, Indiana 46556 (USA)  
Fax (574) 631-6652  
E-mail: Scheidt.1@nd.edu

Dr. Alexander Barabanchikov, Prof. J. Timothy Sage  
Department of Physics and Center for Interdisciplinary Research on Complex Systems,  
Northeastern University, Boston, Massachusetts 02115 (USA)  
E-mail: jtsage@neu.edu

Dr. E. Ercan Alp, Dr. Wolfgang Sturhahn, Dr. Jiyong Zhao  
Advanced Photon Source, Argonne National Laboratory  
Argonne, Illinois 60439 (USA)

Prof. Charles E. Schulz  
Department of Physics, Knox College  
Galesburg, Illinois 61401 (USA)

[★★] We thank the National Institutes of Health for support of this research under Grant GM-38401 to WRS and the NSF under PHY-0545787 to JTS. Use of the Advanced Photon Source, an Office of Science User Facility operated for the US Department of Energy (DOE) Office of Science by Argonne National Laboratory, was supported by the U.S. DOE under Contract No. DE-AC02-06CH11357.

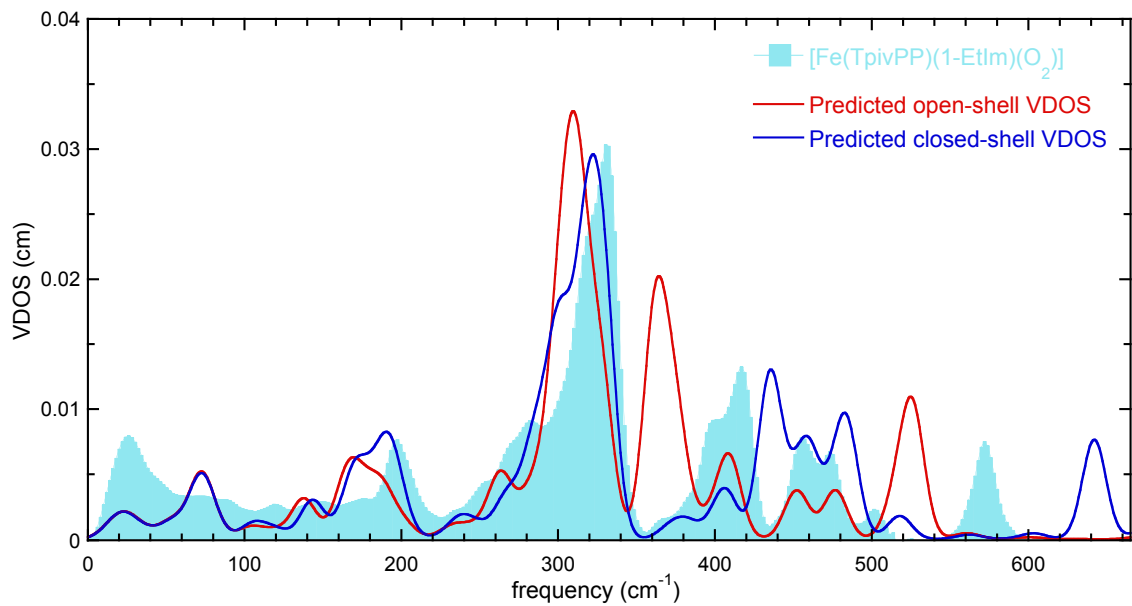

**Figure S1.** Comparison of the observed powder spectrum of [Fe(TpivPP)(1-EtIm)(O<sub>2</sub>)] (filled blue) with the DFT predicted spectrum of the closed shell singlet (blue line) and the DFT predicted spectrum of the open shell singlet (red line).

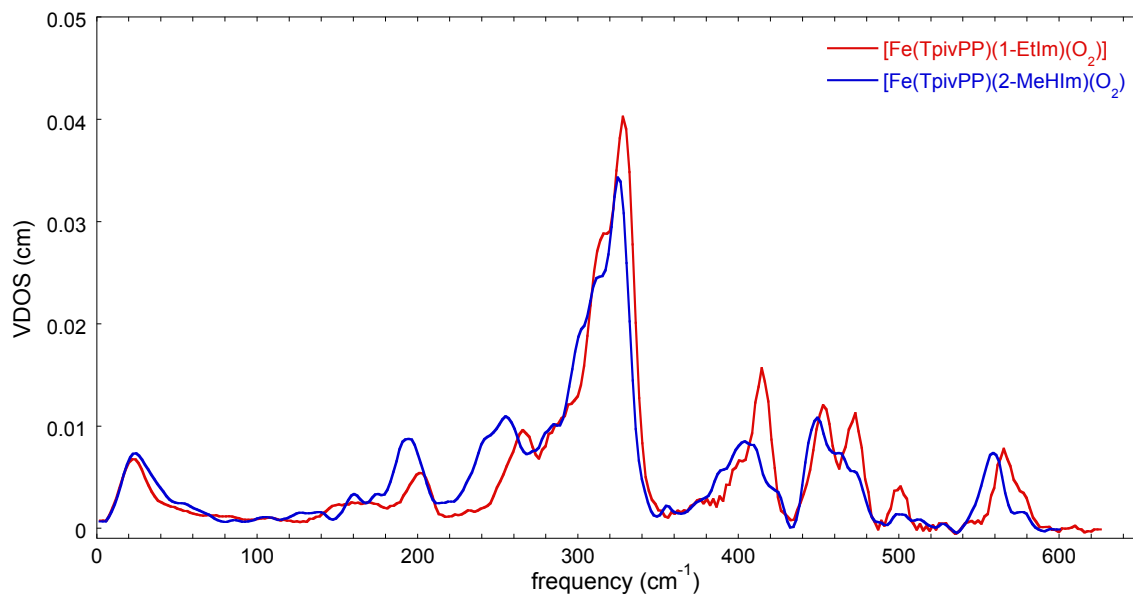

**Figure S2.** The measured in-plane VDOS for [Fe(TpivPP)(2-MeHIm)(O<sub>2</sub>)] and [Fe(TpivPP)(1-EtIm)(O<sub>2</sub>)]. The in-plane spectrum was taken with the porphyrin plane oriented parallel to the excitation beam.

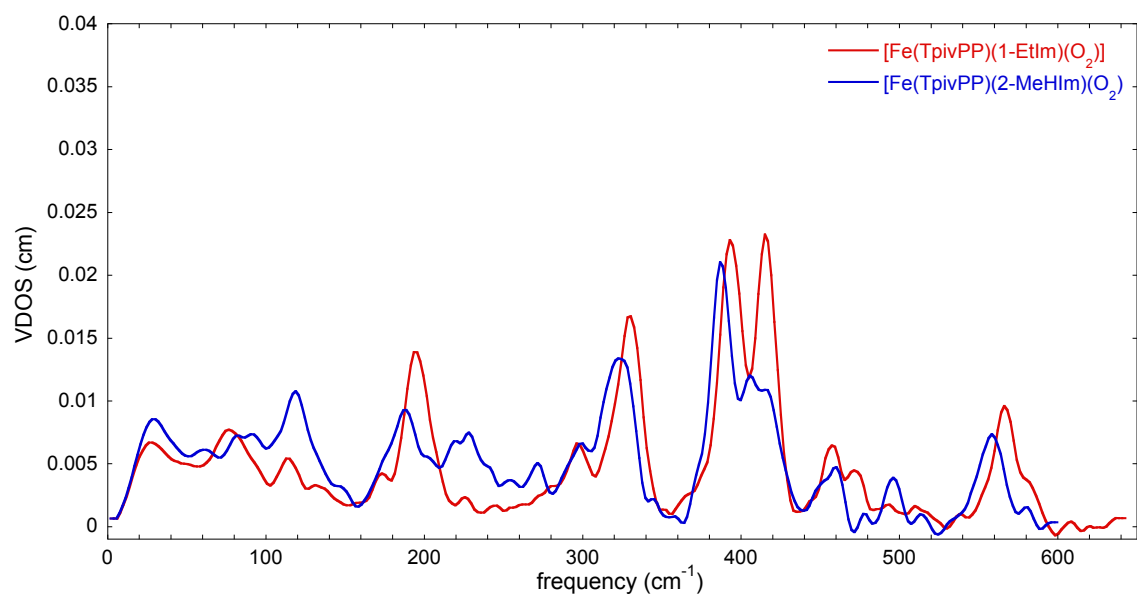

**Figure S3.** The measured out-of-plane VDOS for [Fe(TpivPP)(2-MeHIm)(O<sub>2</sub>)] and [Fe(TpivPP)(1-EtIm)(O<sub>2</sub>)]. The out-of-plane spectra were taken with the porphyrin plane oriented perpendicular to the excitation beam.

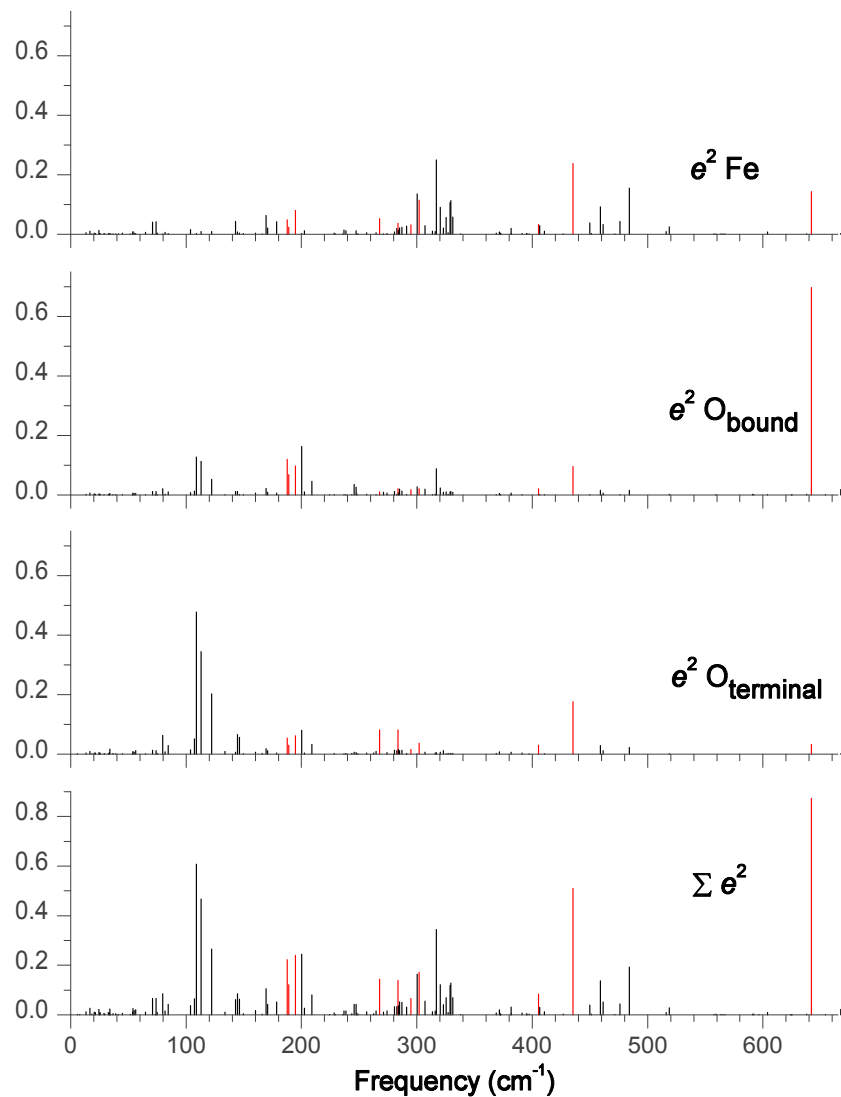

**Figure S4.** The predicted vibrational kinetic energy distributions over the Fe–O<sub>2</sub> fragment in [Fe(TpivPP)(1-EtIm)(O<sub>2</sub>)]. The heights of the individual bars equal the fraction of the kinetic energy associated with each atom or group. The lower panel shows the sum of the mode composition factors for Fe, O<sub>bound</sub>, and O<sub>terminal</sub>, and gives the fraction of mode energy localized on the Fe–O<sub>2</sub> fragment. Red bars indicate Fe–O<sub>2</sub> modes.

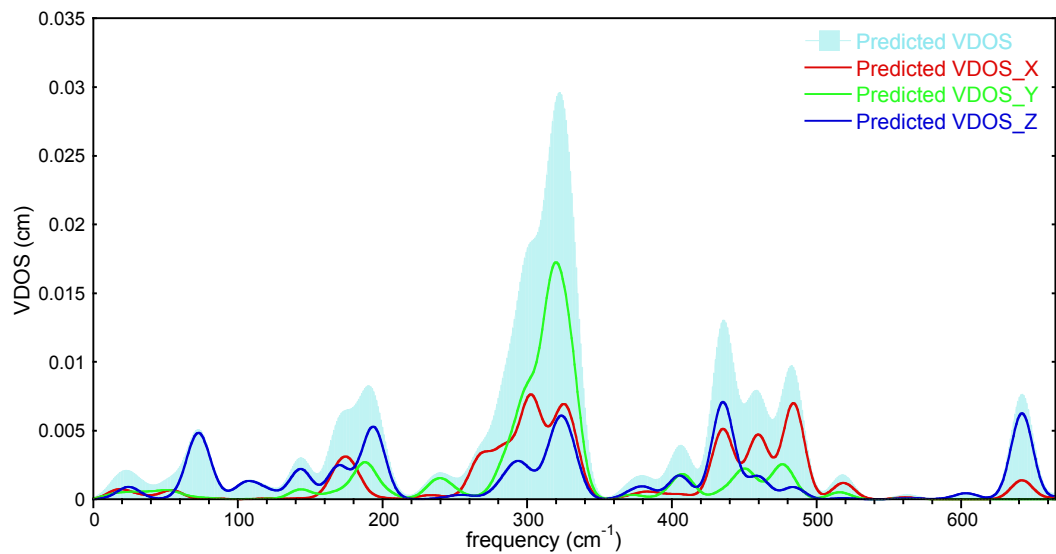

**Figure S5.** The predicted VDOS for  $[\text{Fe}(\text{TpivPP})(1\text{-EtIm})(\text{O}_2)]$  displaying the predicted anisotropy in the vibrational spectrum for the observed orientation of  $\text{O}_2$  and imidazole. The color code for the plot shows the projection of iron motion along  $z$  (perpendicular to porphyrin plane, blue),  $x$  (along the  $\text{Fe}-\text{O}_2$  plane, red) and  $y$  (perpendicular to the  $\text{Fe}-\text{O}_2$  plane, green).

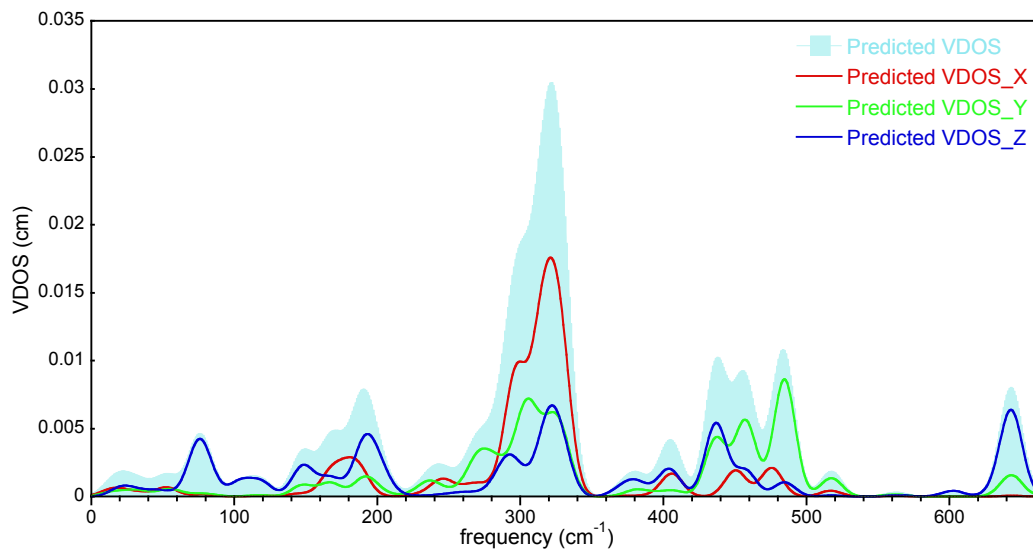

**Figure S6.** The predicted VDOS for  $[\text{Fe}(\text{TpivPP})(1\text{-EtIm})(\text{O}_2)]$  displaying the anisotropy in the vibrational spectrum; after rotation of the  $\text{Fe}-\text{O}_2$  plane by  $90^\circ$  holding all else constant. The color code for the plot shows the projection of iron motion along  $z$  (perpendicular to porphyrin plane, dark blue),  $x$  (perpendicular to the  $\text{Fe}-\text{O}_2$  plane, red) and  $y$  (parallel to the  $\text{Fe}-\text{O}_2$  plane, green). The  $\text{Fe}-\text{O}_2$  and imidazole planes are chosen to be coplanar and bisecting two opposite  $\text{N}-\text{Fe}-\text{N}$  angles.

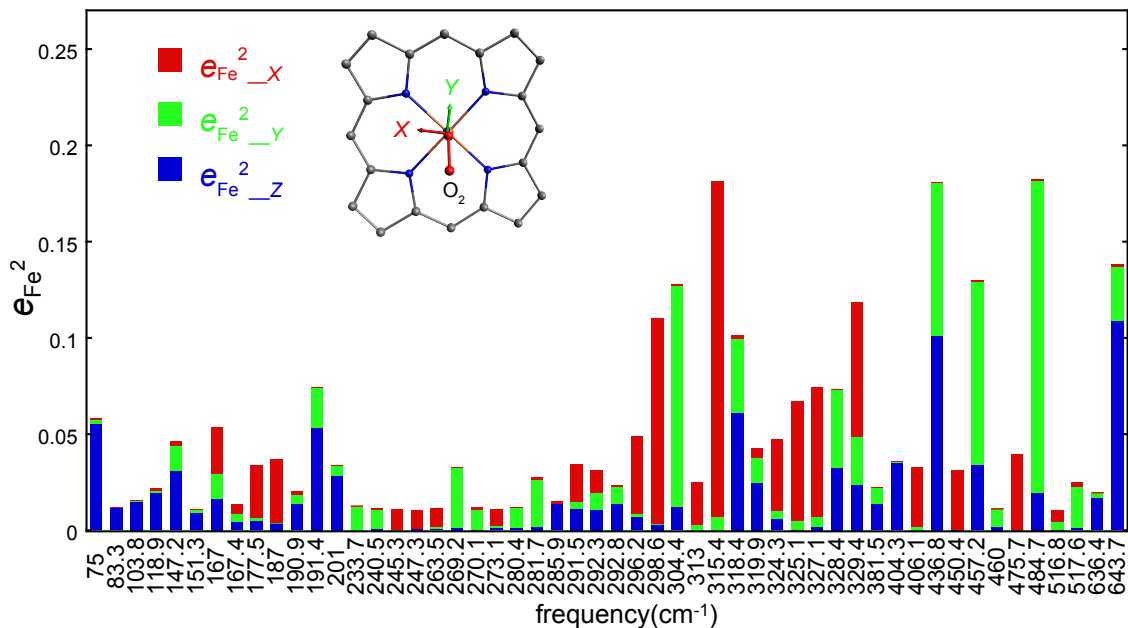

**Figure S7.** The predicted directional characteristics of all modes with  $e_{Fe}^2 > 0.01$  for the idealized structure in which the Fe–O<sub>2</sub> and imidazole planes were required to be coplanar. The values of the predicted frequencies are given at each tick mark, but the horizontal scale is only approximately linear in frequency to avoid overlaps. The color code for the plot shows the projection of iron motion along  $z$  (perpendicular to porphyrin plane, blue),  $x$  (perpendicular to the Fe–O<sub>2</sub> projection, red) and  $y$  (along the Fe–O<sub>2</sub> projection, green). Note that although the relative orientation of the Fe–O<sub>2</sub> plane has changed, we retain the same coordinate system and color scheme as in Figure 5 (main text) to facilitate comparisons.



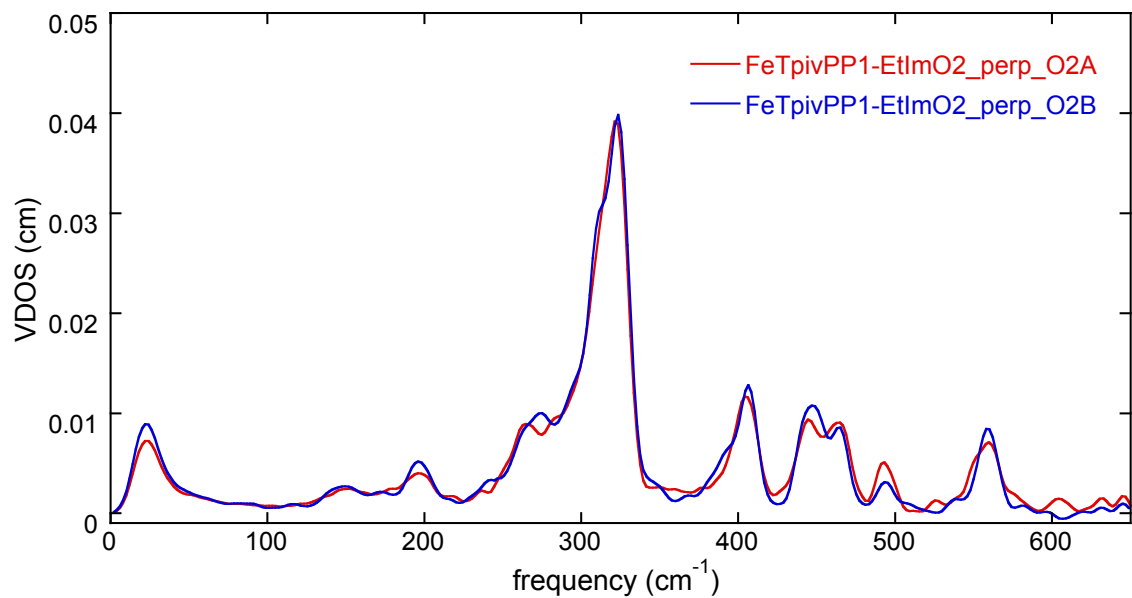

**Figure S8.** Experimental in-plane spectra taken in the direction perpendicular to the two nearly orthogonal Fe-O<sub>2</sub> orientations in [Fe(TpivotPP)(1-EtIm)(O<sub>2</sub>)].

194.6  $\text{cm}^{-1}$   
 $e_{\text{Fe}}^2 = 0.080$

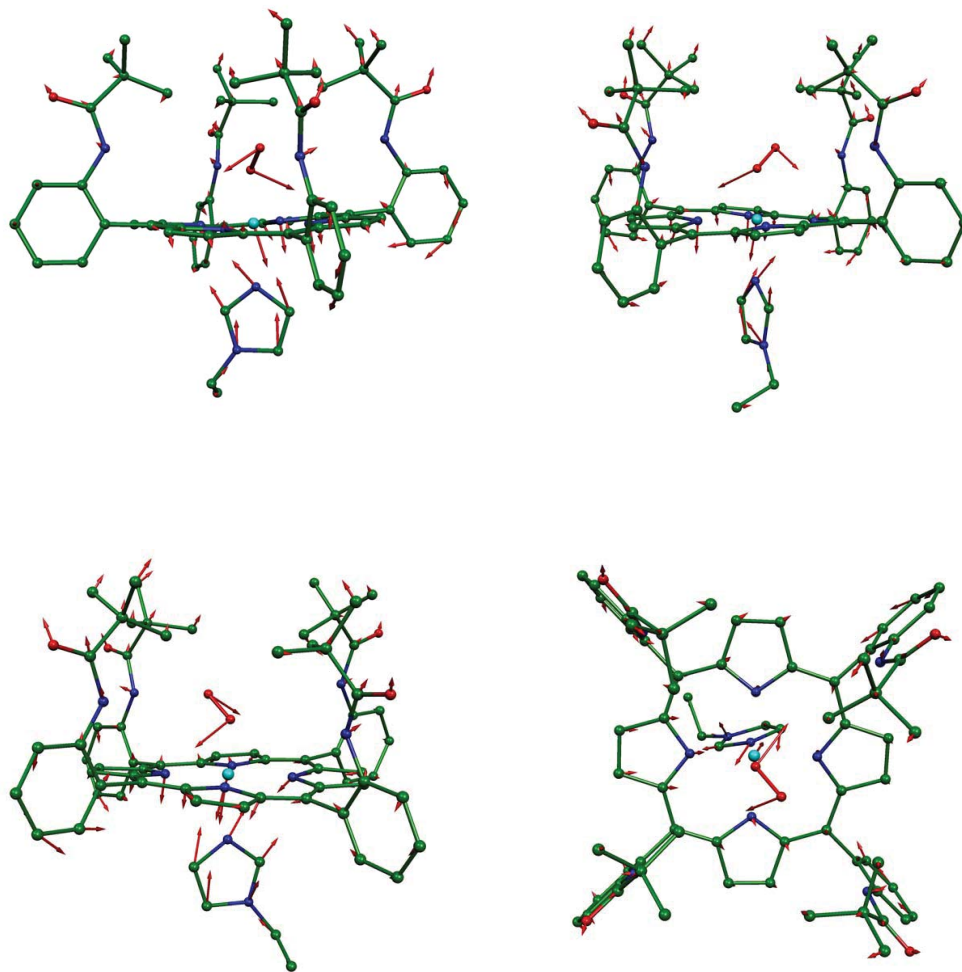

**Figure S9.** Edge and top views of the predicted 195  $\text{cm}^{-1}$  mode of  $[\text{Fe}(\text{TpivPP})(1\text{-EtIm})(\text{O}_2)]$ .

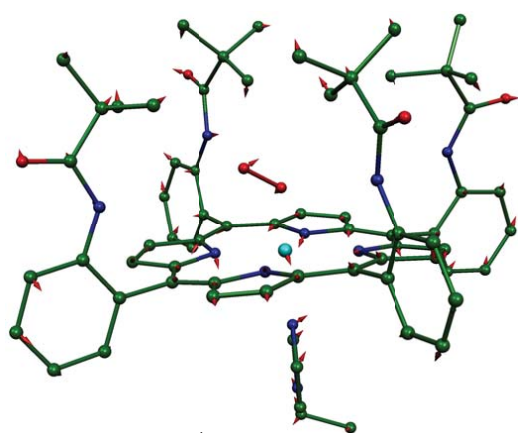

202.4 cm<sup>-1</sup>  
 $e_{\text{Fe}}^2 = 0.012$

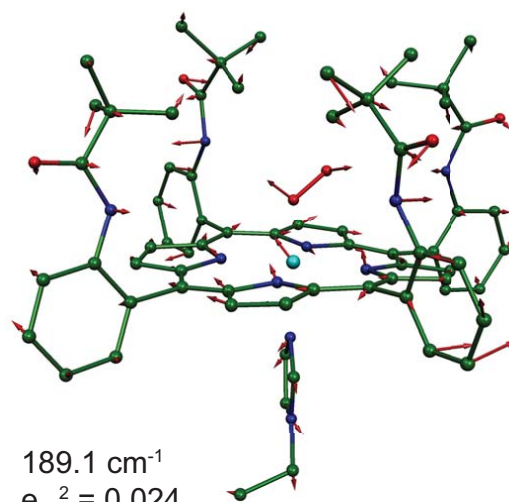

189.1 cm<sup>-1</sup>  
 $e_{\text{Fe}}^2 = 0.024$

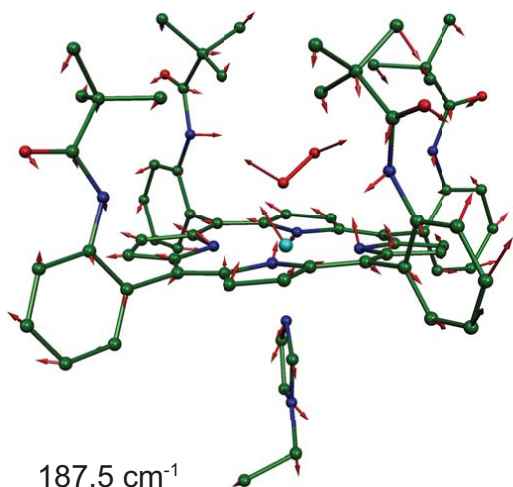

187.5 cm<sup>-1</sup>  
 $e_{\text{Fe}}^2 = 0.049$

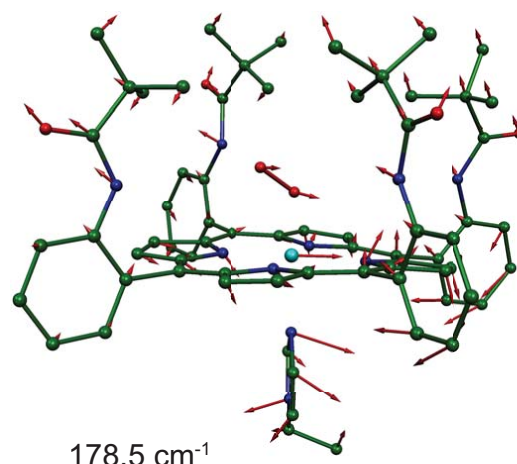

178.5 cm<sup>-1</sup>  
 $e_{\text{Fe}}^2 = 0.042$

**Figure S10.** The predicted vibrational modes of [Fe(TpivPP)(1-EtIm)(O<sub>2</sub>)] in the region from 202 cm<sup>-1</sup> to 70 cm<sup>-1</sup>.

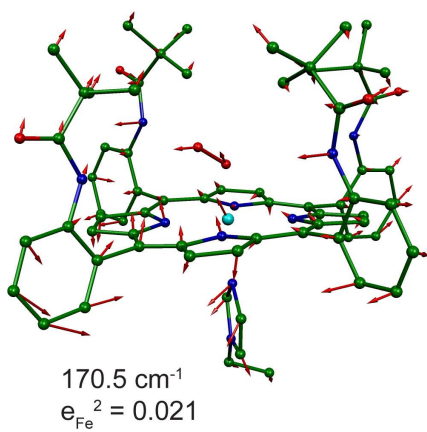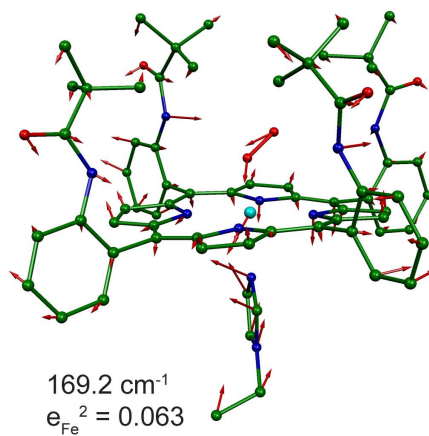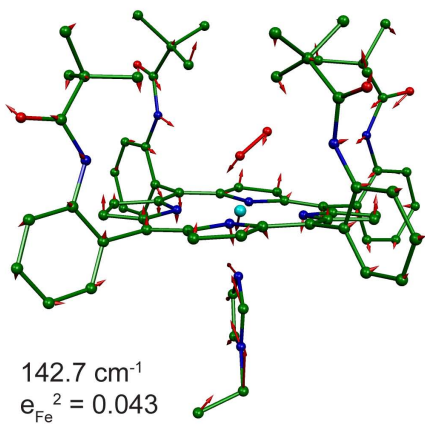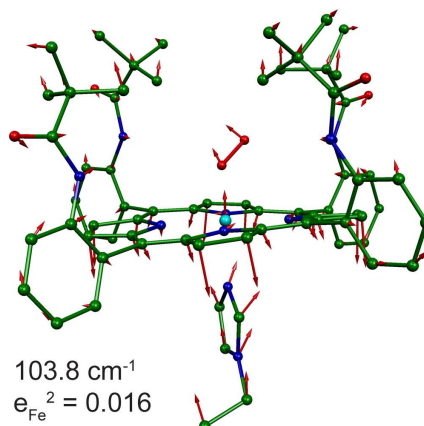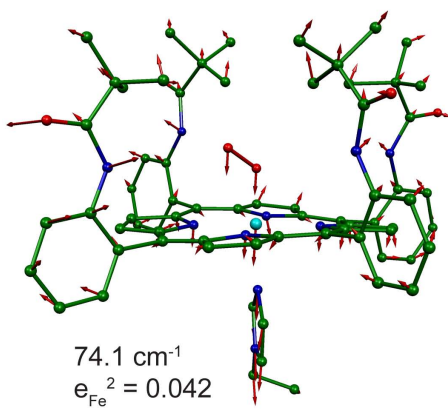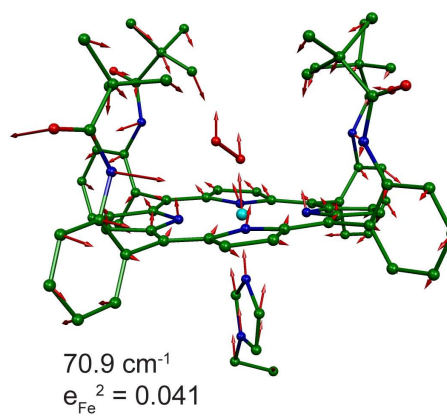

Figure S10. Continued.

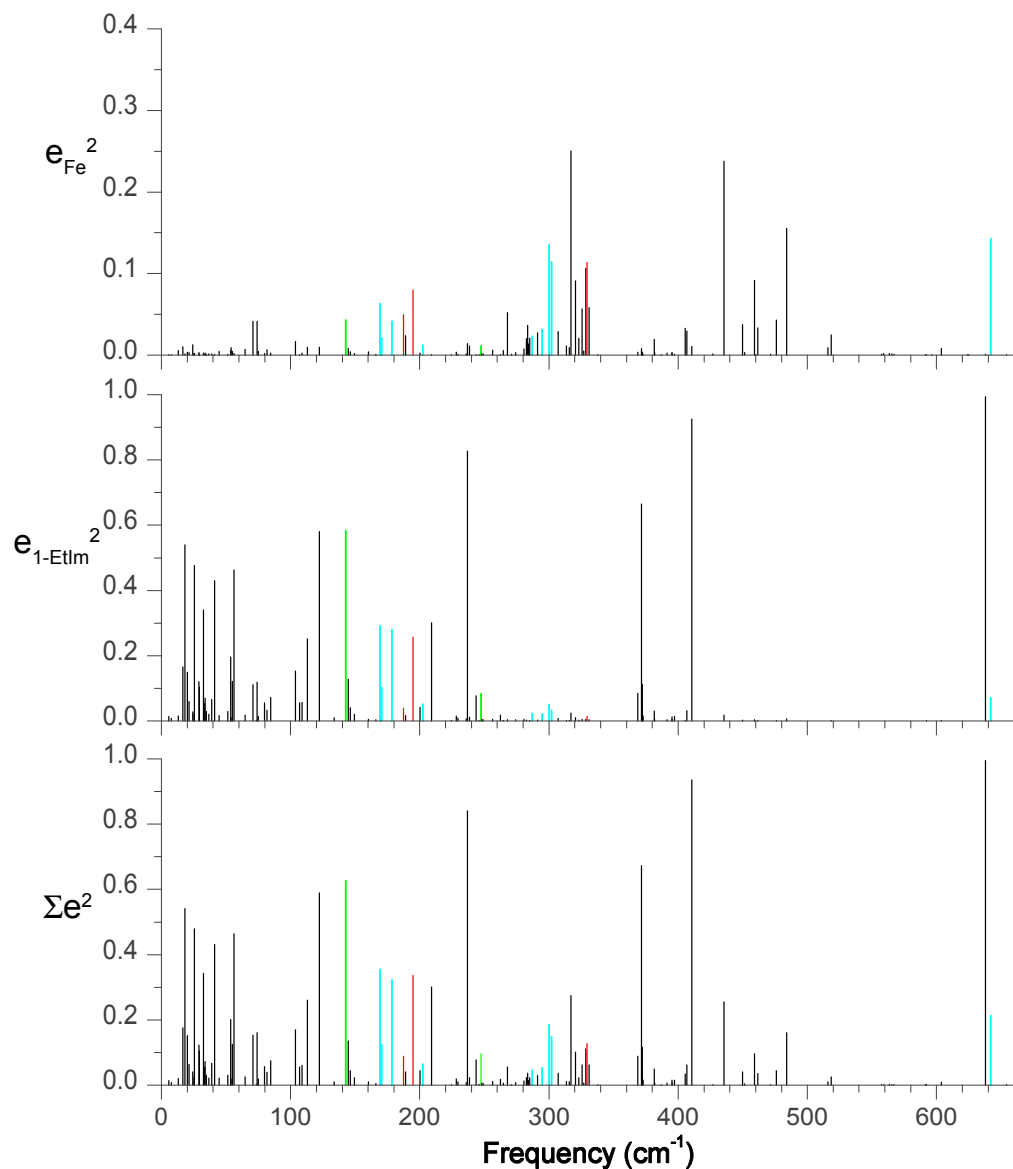

**Figure S11.** The predicted vibrational kinetic energy distributions of the Fe-1-EtIm fragment (which includes all 15 atoms of the 1-EtIm group) in  $[\text{Fe}(\text{TpivPP})(1\text{-EtIm})(\text{O}_2)]$ . The height of the individual bars equals the fraction of the kinetic energy associated with each atom or group. The lower panel shows the sum of the mode composition factors for Fe and 1-EtIm, and gives the fraction of mode energy localized on the Fe-1-EtIm fragment. Note the  $e_{\text{Fe}}^2$  plot is on a different scale. Modes that involve simultaneously Fe and 1-EtIm motions are colored. Red and light blue bars indicate Fe-1-EtIm translation modes with 1-EtIm movement parallel or perpendicular to Fe-N<sub>Im</sub> vector respectively; green bars indicate modes with strong imidazole rotation as well as Fe-Im stretch.

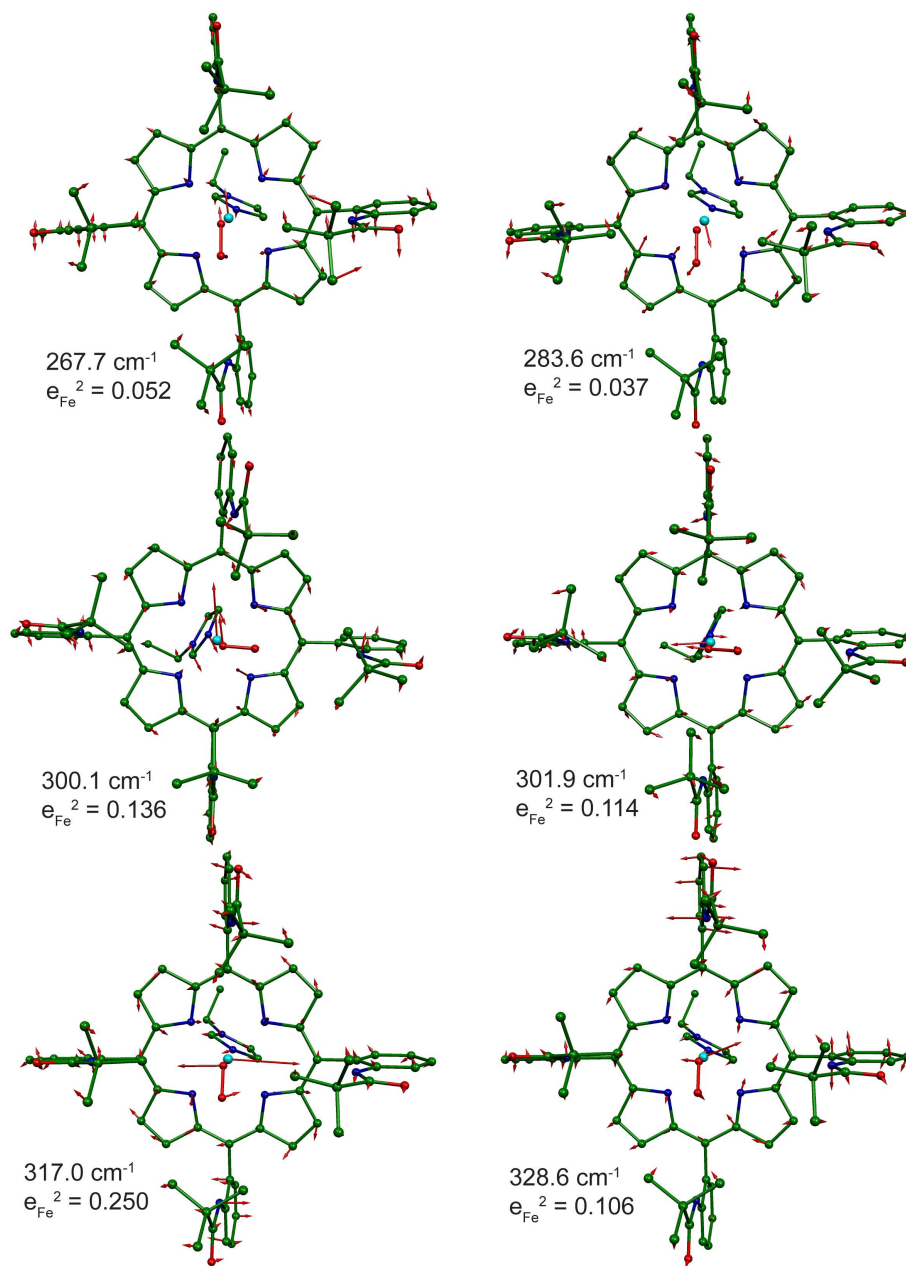

**Figure S12.** The predicted in-plane modes of  $[\text{Fe}(\text{TpivPP})(1\text{-EtIm})(\text{O}_2)]$  in the frequency range of 260–330  $\text{cm}^{-1}$ . Note the direction of iron motion relative the the orientation of the Fe–O<sub>2</sub> plane.

294.8  $\text{cm}^{-1}$ ,  $e^2=0.031$

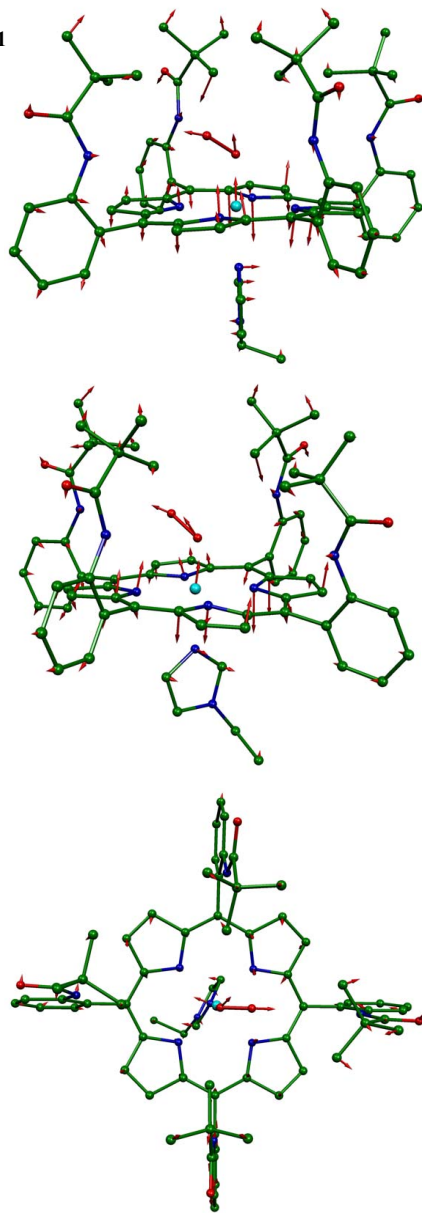

**Figure S13.** The predicted character of the band observed at 296  $\text{cm}^{-1}$ .

**Table S1.**  $x$ ,  $y$ ,  $z$  components of iron energy for normal modes with total iron energy above 0.01 of [Fe(TpivPP)(1-EtIm)(O<sub>2</sub>)]. (optimized on a structure with the Fe--O--O plane near-perpendicular to imidazole plane).

| Mode(cm <sup>-1</sup> ) | e <sup>2</sup> <sub>x</sub> | e <sup>2</sup> <sub>y</sub> | e <sup>2</sup> <sub>z</sub> | e <sup>2</sup> |
|-------------------------|-----------------------------|-----------------------------|-----------------------------|----------------|
| 16.6                    | 0.009                       | 0.000                       | 0.000                       | 0.010          |
| 24.4                    | 0.000                       | 0.001                       | 0.011                       | 0.013          |
| 70.9                    | 0.000                       | 0.000                       | 0.041                       | 0.041          |
| 74.1                    | 0.000                       | 0.001                       | 0.041                       | 0.042          |
| 103.8                   | 0.000                       | 0.000                       | 0.016                       | 0.016          |
| 142.7                   | 0.001                       | 0.012                       | 0.030                       | 0.043          |
| 169.2                   | 0.026                       | 0.006                       | 0.032                       | 0.063          |
| 170.5                   | 0.008                       | 0.001                       | 0.013                       | 0.021          |
| 178.5                   | 0.036                       | 0.005                       | 0.000                       | 0.042          |
| 187.5                   | 0.001                       | 0.031                       | 0.018                       | 0.049          |
| 189.1                   | 0.001                       | 0.016                       | 0.007                       | 0.024          |
| 194.6                   | 0.000                       | 0.001                       | 0.079                       | 0.080          |
| 202.4                   | 0.000                       | 0.008                       | 0.004                       | 0.012          |
| 236.8                   | 0.002                       | 0.012                       | 0.000                       | 0.014          |
| 238.5                   | 0.000                       | 0.011                       | 0.000                       | 0.011          |
| 247.4                   | 0.001                       | 0.010                       | 0.001                       | 0.012          |
| 267.7                   | 0.051                       | 0.002                       | 0.000                       | 0.052          |
| 282.5                   | 0.010                       | 0.010                       | 0.000                       | 0.020          |
| 283.6                   | 0.027                       | 0.006                       | 0.004                       | 0.037          |
| 284.1                   | 0.008                       | 0.003                       | 0.002                       | 0.014          |
| 285.0                   | 0.002                       | 0.018                       | 0.001                       | 0.021          |
| 287.1                   | 0.015                       | 0.001                       | 0.007                       | 0.023          |
| 291.2                   | 0.000                       | 0.020                       | 0.007                       | 0.027          |
| 294.8                   | 0.000                       | 0.000                       | 0.031                       | 0.031          |
| 300.1                   | 0.013                       | 0.122                       | 0.000                       | 0.136          |
| 301.9                   | 0.103                       | 0.001                       | 0.010                       | 0.114          |
| 307.2                   | 0.025                       | 0.000                       | 0.004                       | 0.029          |
| 313.6                   | 0.000                       | 0.010                       | 0.001                       | 0.011          |
| 317.0                   | 0.001                       | 0.234                       | 0.015                       | 0.250          |
| 320.4                   | 0.043                       | 0.001                       | 0.048                       | 0.091          |
| 323.0                   | 0.012                       | 0.007                       | 0.002                       | 0.021          |
| 325.5                   | 0.029                       | 0.000                       | 0.028                       | 0.057          |
| 328.6                   | 0.024                       | 0.078                       | 0.004                       | 0.106          |
| 329.4                   | 0.007                       | 0.090                       | 0.017                       | 0.114          |
| 331.1                   | 0.034                       | 0.004                       | 0.021                       | 0.058          |
| 381.6                   | 0.007                       | 0.001                       | 0.012                       | 0.019          |
| 405.4                   | 0.003                       | 0.000                       | 0.030                       | 0.033          |
| 406.6                   | 0.001                       | 0.026                       | 0.002                       | 0.029          |
| 410.7                   | 0.002                       | 0.008                       | 0.000                       | 0.011          |
| 435.3                   | 0.095                       | 0.010                       | 0.133                       | 0.238          |
| 449.9                   | 0.000                       | 0.037                       | 0.000                       | 0.038          |
| 459.0                   | 0.065                       | 0.003                       | 0.024                       | 0.091          |



|       |       |       |       |       |
|-------|-------|-------|-------|-------|
| 461.5 | 0.023 | 0.003 | 0.007 | 0.033 |
| 475.9 | 0.001 | 0.043 | 0.000 | 0.043 |
| 484.1 | 0.131 | 0.008 | 0.017 | 0.155 |
| 518.6 | 0.023 | 0.000 | 0.002 | 0.025 |
| 642.0 | 0.026 | 0.000 | 0.117 | 0.143 |
| 677.3 | 0.009 | 0.000 | 0.004 | 0.013 |

**Table S2.** *x*, *y*, *z* components of iron energy for normal modes with total iron energy above 0.01 of [Fe(TpivPP)(1-EtIm)(O<sub>2</sub>)] (optimized on a structure with the Fe--O plane near-coplanar to imidazole plane).

| Mode(cm <sup>-1</sup> ) | e <sup>2</sup> <sub>x</sub> | e <sup>2</sup> <sub>y</sub> | e <sup>2</sup> <sub>z</sub> | e <sup>2</sup> |
|-------------------------|-----------------------------|-----------------------------|-----------------------------|----------------|
| 75.0                    | 0.001                       | 0.002                       | 0.056                       | 0.058          |
| 83.3                    | 0.000                       | 0.000                       | 0.012                       | 0.012          |
| 103.8                   | 0.000                       | 0.000                       | 0.015                       | 0.015          |
| 118.9                   | 0.001                       | 0.001                       | 0.020                       | 0.022          |
| 147.2                   | 0.002                       | 0.013                       | 0.031                       | 0.046          |
| 151.3                   | 0.001                       | 0.001                       | 0.009                       | 0.011          |
| 167.0                   | 0.024                       | 0.013                       | 0.016                       | 0.053          |
| 167.4                   | 0.005                       | 0.004                       | 0.005                       | 0.013          |
| 177.5                   | 0.027                       | 0.002                       | 0.005                       | 0.034          |
| 187.0                   | 0.033                       | 0.000                       | 0.004                       | 0.037          |
| 190.9                   | 0.002                       | 0.005                       | 0.014                       | 0.020          |
| 191.4                   | 0.000                       | 0.020                       | 0.053                       | 0.074          |
| 201.0                   | 0.000                       | 0.006                       | 0.028                       | 0.034          |
| 233.7                   | 0.000                       | 0.013                       | 0.000                       | 0.013          |
| 240.5                   | 0.001                       | 0.010                       | 0.001                       | 0.012          |
| 245.3                   | 0.011                       | 0.000                       | 0.000                       | 0.011          |
| 247.3                   | 0.010                       | 0.000                       | 0.001                       | 0.011          |
| 263.5                   | 0.010                       | 0.001                       | 0.001                       | 0.011          |
| 269.2                   | 0.000                       | 0.031                       | 0.001                       | 0.033          |
| 270.1                   | 0.001                       | 0.011                       | 0.000                       | 0.012          |
| 273.1                   | 0.009                       | 0.001                       | 0.001                       | 0.011          |
| 280.4                   | 0.000                       | 0.010                       | 0.002                       | 0.012          |
| 281.7                   | 0.001                       | 0.024                       | 0.002                       | 0.027          |
| 285.9                   | 0.001                       | 0.001                       | 0.014                       | 0.015          |
| 291.5                   | 0.020                       | 0.004                       | 0.011                       | 0.034          |
| 292.3                   | 0.012                       | 0.009                       | 0.011                       | 0.031          |
| 292.8                   | 0.001                       | 0.009                       | 0.014                       | 0.023          |
| 296.2                   | 0.040                       | 0.002                       | 0.007                       | 0.049          |
| 298.6                   | 0.107                       | 0.000                       | 0.003                       | 0.110          |
| 304.4                   | 0.001                       | 0.115                       | 0.012                       | 0.128          |
| 313.0                   | 0.022                       | 0.003                       | 0.000                       | 0.025          |
| 315.4                   | 0.174                       | 0.007                       | 0.000                       | 0.181          |
| 318.4                   | 0.002                       | 0.039                       | 0.061                       | 0.102          |
| 319.9                   | 0.005                       | 0.013                       | 0.025                       | 0.043          |
| 324.3                   | 0.037                       | 0.004                       | 0.006                       | 0.047          |

|       |       |       |       |       |
|-------|-------|-------|-------|-------|
| 325.1 | 0.062 | 0.005 | 0.000 | 0.067 |
| 327.1 | 0.067 | 0.005 | 0.002 | 0.075 |
| 328.4 | 0.000 | 0.040 | 0.033 | 0.073 |
| 329.4 | 0.070 | 0.025 | 0.024 | 0.119 |
| 381.5 | 0.000 | 0.008 | 0.014 | 0.022 |
| 404.3 | 0.000 | 0.000 | 0.035 | 0.036 |
| 406.1 | 0.031 | 0.002 | 0.000 | 0.033 |
| 436.8 | 0.000 | 0.080 | 0.101 | 0.181 |
| 450.4 | 0.031 | 0.000 | 0.000 | 0.031 |
| 457.2 | 0.001 | 0.095 | 0.034 | 0.130 |
| 460.0 | 0.000 | 0.009 | 0.002 | 0.011 |
| 475.7 | 0.039 | 0.000 | 0.000 | 0.040 |
| 484.7 | 0.001 | 0.162 | 0.020 | 0.182 |
| 516.8 | 0.006 | 0.004 | 0.000 | 0.010 |
| 517.6 | 0.002 | 0.021 | 0.002 | 0.025 |
| 636.4 | 0.000 | 0.003 | 0.017 | 0.020 |
| 643.7 | 0.001 | 0.028 | 0.109 | 0.138 |

**Table S3.**  $x$ ,  $y$ ,  $z$  components of iron energy for normal modes with total iron energy above 0.01 of [Fe(TpivPP)(2-MeHIm)(O<sub>2</sub>)] (optimized on a structure with the Fe--O--O plane near-perpendicular to imidazole plane).

| Mode(cm <sup>-1</sup> ) | e <sup>2</sup> <sub>x</sub> | e <sup>2</sup> <sub>y</sub> | e <sup>2</sup> <sub>z</sub> | e <sup>2</sup> |
|-------------------------|-----------------------------|-----------------------------|-----------------------------|----------------|
| 23.1                    | 0.001                       | 0.000                       | 0.011                       | 0.012          |
| 54.7                    | 0.008                       | 0.004                       | 0.000                       | 0.012          |
| 74.9                    | 0.000                       | 0.000                       | 0.034                       | 0.035          |
| 77.5                    | 0.001                       | 0.000                       | 0.051                       | 0.052          |
| 106.6                   | 0.000                       | 0.000                       | 0.019                       | 0.019          |
| 112.2                   | 0.000                       | 0.001                       | 0.020                       | 0.021          |
| 148.0                   | 0.001                       | 0.009                       | 0.006                       | 0.016          |
| 155.4                   | 0.034                       | 0.000                       | 0.018                       | 0.052          |
| 158.8                   | 0.006                       | 0.001                       | 0.080                       | 0.086          |
| 160.8                   | 0.002                       | 0.003                       | 0.041                       | 0.045          |
| 170.5                   | 0.000                       | 0.013                       | 0.005                       | 0.019          |
| 185.5                   | 0.000                       | 0.004                       | 0.059                       | 0.063          |
| 195.5                   | 0.000                       | 0.031                       | 0.002                       | 0.033          |
| 199.4                   | 0.023                       | 0.000                       | 0.003                       | 0.027          |
| 203.6                   | 0.000                       | 0.011                       | 0.001                       | 0.011          |
| 248.0                   | 0.000                       | 0.011                       | 0.000                       | 0.011          |
| 261.8                   | 0.014                       | 0.002                       | 0.002                       | 0.018          |
| 271.9                   | 0.034                       | 0.000                       | 0.003                       | 0.036          |
| 278.3                   | 0.002                       | 0.002                       | 0.020                       | 0.023          |
| 285.5                   | 0.012                       | 0.006                       | 0.001                       | 0.019          |
| 289.5                   | 0.018                       | 0.000                       | 0.008                       | 0.026          |
| 292.8                   | 0.013                       | 0.006                       | 0.001                       | 0.020          |
| 296.4                   | 0.004                       | 0.000                       | 0.023                       | 0.027          |
| 299.5                   | 0.028                       | 0.097                       | 0.001                       | 0.126          |

|       |       |       |       |       |
|-------|-------|-------|-------|-------|
| 304.2 | 0.083 | 0.026 | 0.003 | 0.112 |
| 313.7 | 0.002 | 0.007 | 0.002 | 0.011 |
| 315.8 | 0.008 | 0.011 | 0.002 | 0.022 |
| 318.2 | 0.002 | 0.135 | 0.002 | 0.139 |
| 319.9 | 0.042 | 0.002 | 0.045 | 0.089 |
| 324.9 | 0.027 | 0.017 | 0.012 | 0.056 |
| 325.4 | 0.030 | 0.083 | 0.005 | 0.118 |
| 326.6 | 0.030 | 0.000 | 0.007 | 0.037 |
| 329.3 | 0.032 | 0.044 | 0.018 | 0.094 |
| 331.8 | 0.027 | 0.000 | 0.010 | 0.038 |
| 332.3 | 0.002 | 0.162 | 0.000 | 0.164 |
| 383.1 | 0.007 | 0.001 | 0.005 | 0.013 |
| 399.8 | 0.001 | 0.013 | 0.001 | 0.015 |
| 408.9 | 0.004 | 0.001 | 0.030 | 0.035 |
| 409.7 | 0.001 | 0.041 | 0.001 | 0.042 |
| 436.0 | 0.080 | 0.001 | 0.131 | 0.212 |
| 450.1 | 0.000 | 0.004 | 0.010 | 0.014 |
| 450.8 | 0.000 | 0.039 | 0.002 | 0.041 |
| 458.0 | 0.082 | 0.001 | 0.037 | 0.120 |
| 476.5 | 0.000 | 0.045 | 0.000 | 0.045 |
| 484.3 | 0.132 | 0.001 | 0.024 | 0.157 |
| 519.0 | 0.026 | 0.000 | 0.003 | 0.029 |
| 643.6 | 0.008 | 0.000 | 0.046 | 0.055 |
| 652.2 | 0.025 | 0.000 | 0.061 | 0.086 |
